# Supplementary material
Source: PubMed Central journal article supplement (PMC3148020)
Supplement: NIHMS307142-supplement-1.pdf [file NIHMS307142-supplement-1.pdf]

Suppl Fig 1

| Subject   | Timepoint | TAFTIPSI | Subject    | Timepoint | TAFTIPSI |
|-----------|-----------|----------|------------|-----------|----------|
| Subject-1 | Baseline  | -----T   | Subject-8  | Baseline  | -----    |
|           | 12 months | -----T   |            | 12 months | -----R   |
|           |           |          |            | 24 months | -----T   |
| Subject-2 | Baseline  | -----T   |            |           |          |
| Subject-3 | Baseline  | -----R   | Subject-9  | Baseline  | -----T   |
|           | 12 months | -----R   |            | 7 months  | -----T   |
|           |           |          |            | 12 months | -----T   |
| Subject-4 | Baseline  | -----    | Subject-10 | Baseline  | -----    |
|           | 12 months | -----    |            | 12 months | -----T   |
|           | 18 months | -----    |            | 24 months | -----T   |
|           | 24 months | -----T   |            |           |          |
| Subject-5 | Baseline  | -----R   | Subject-11 | Baseline  | -----T   |
|           | Baseline  | -----R   |            | 12 months | -----T   |
|           | Baseline  | -----R   |            | 24 months | -----T   |
| Subject-6 | Baseline  | -----R   | Subject-12 | Baseline  | -----T   |
|           | 12 months | -----R   |            |           |          |
|           | 24 months | -----R   | Subject-13 | Baseline  | -----    |
|           | 36 months | -----R   |            | 6 months  | -----T   |
|           |           |          | 12 months  | -----T    |          |
| Subject-7 | Baseline  | -----T   |            |           |          |
|           | 10 months | -----T   |            |           |          |
|           | 12 months | -----T   |            |           |          |
|           | 24 months | -----T   |            |           |          |
|           | 36 months | -----T   |            |           |          |

Suppl Fig 2

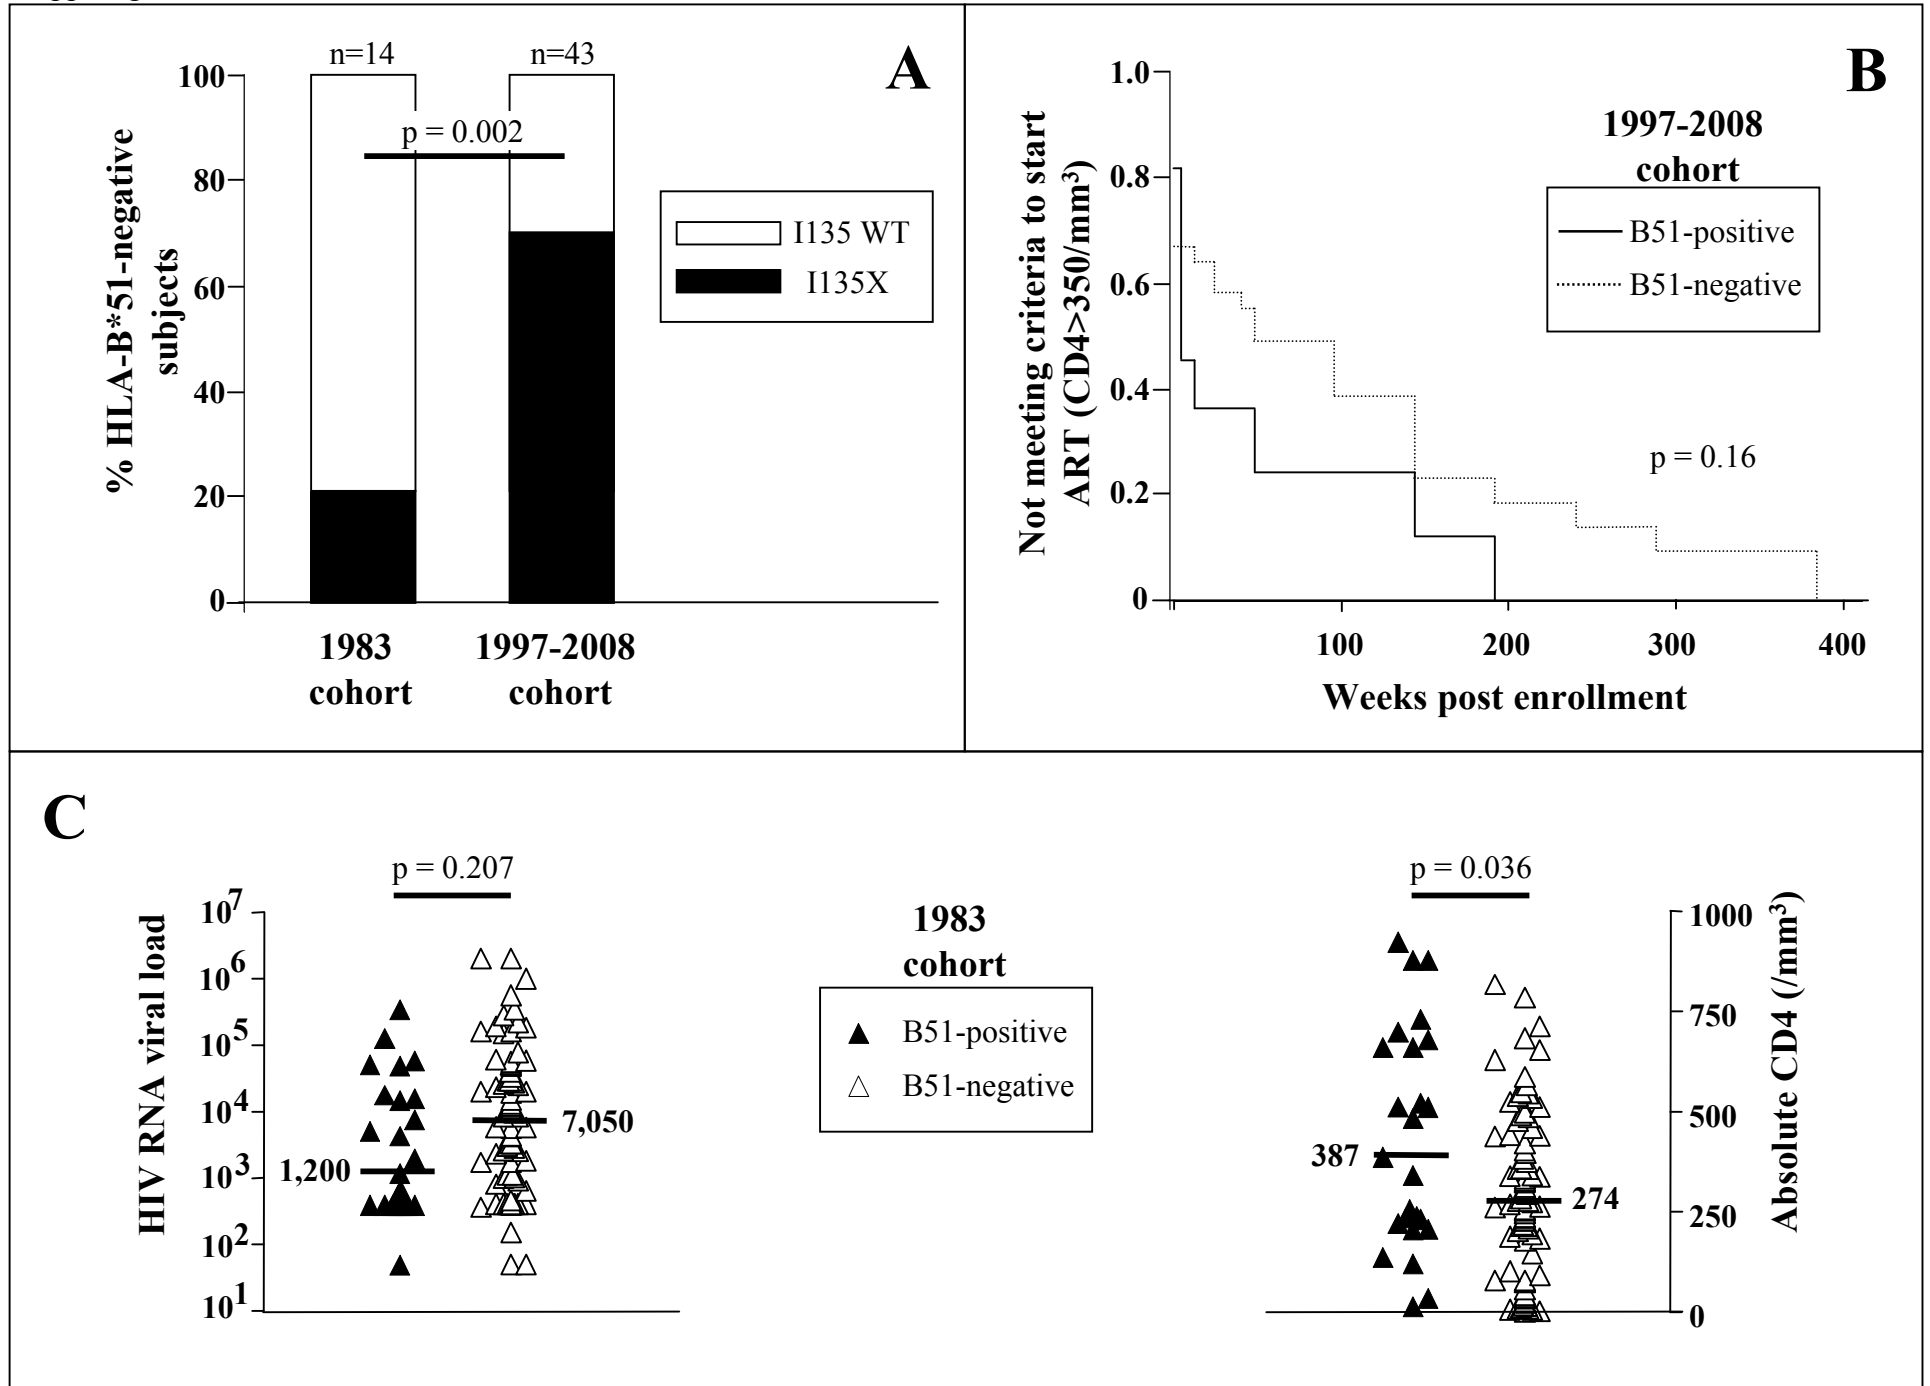

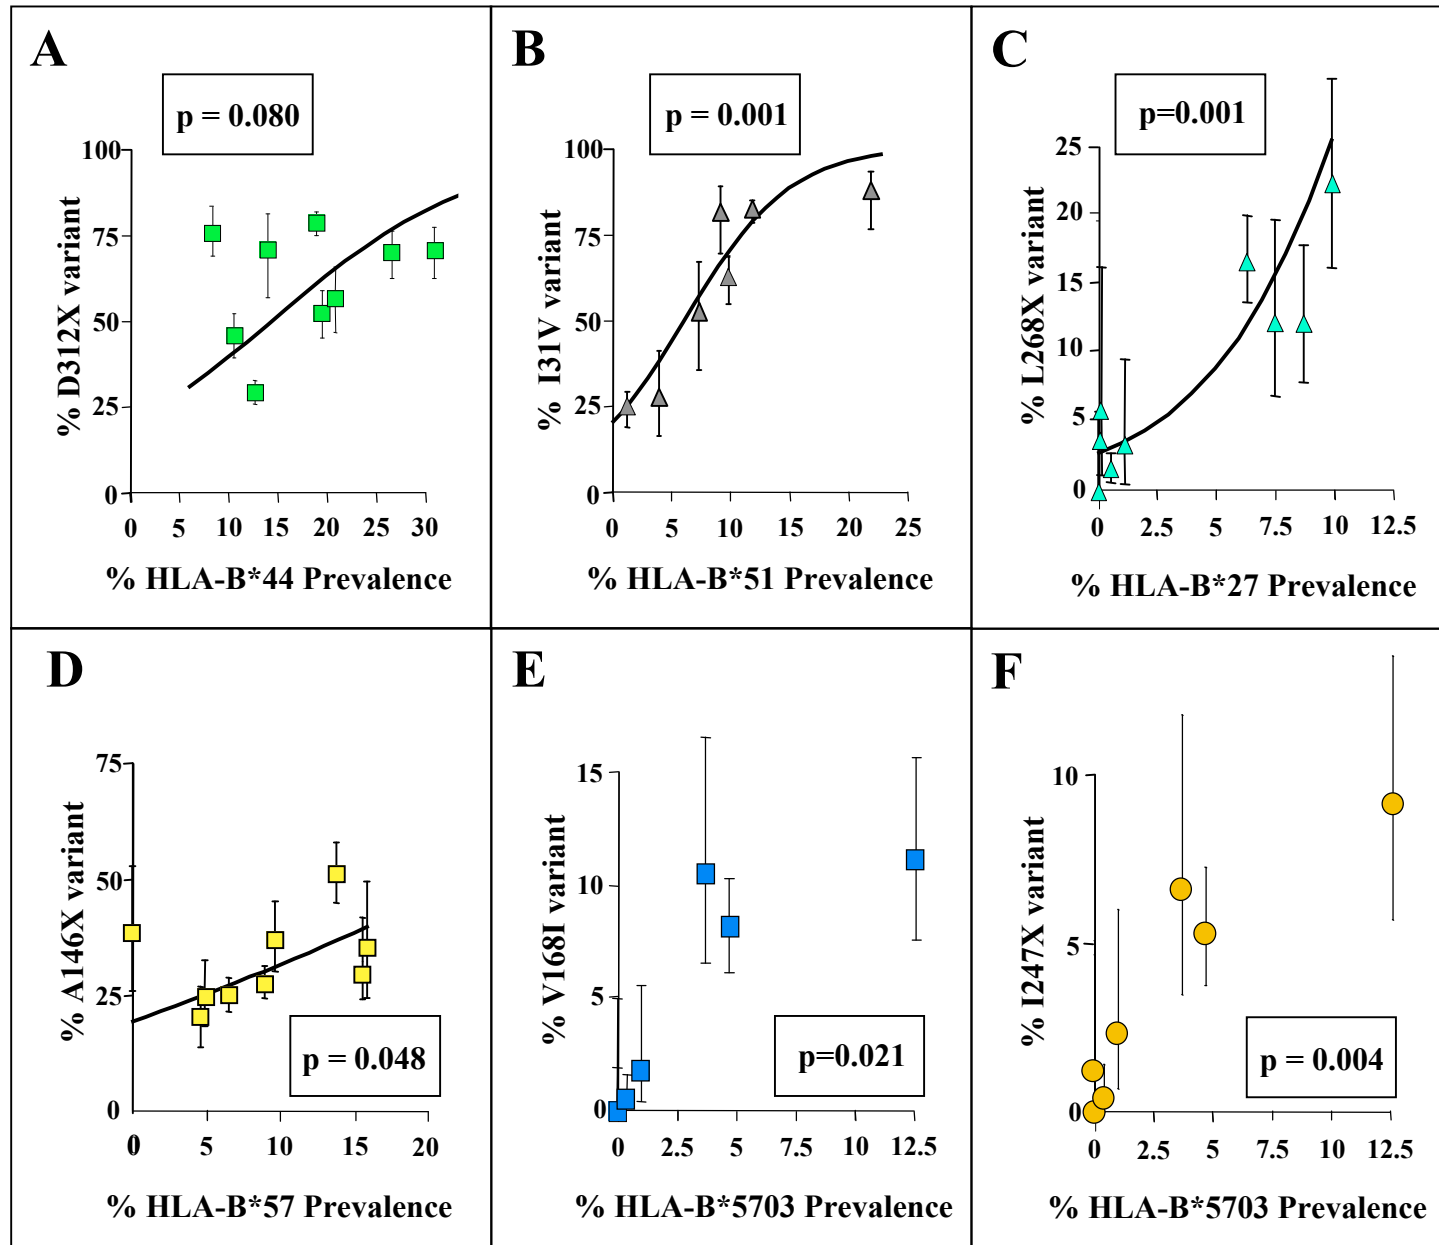

Suppl Fig 4

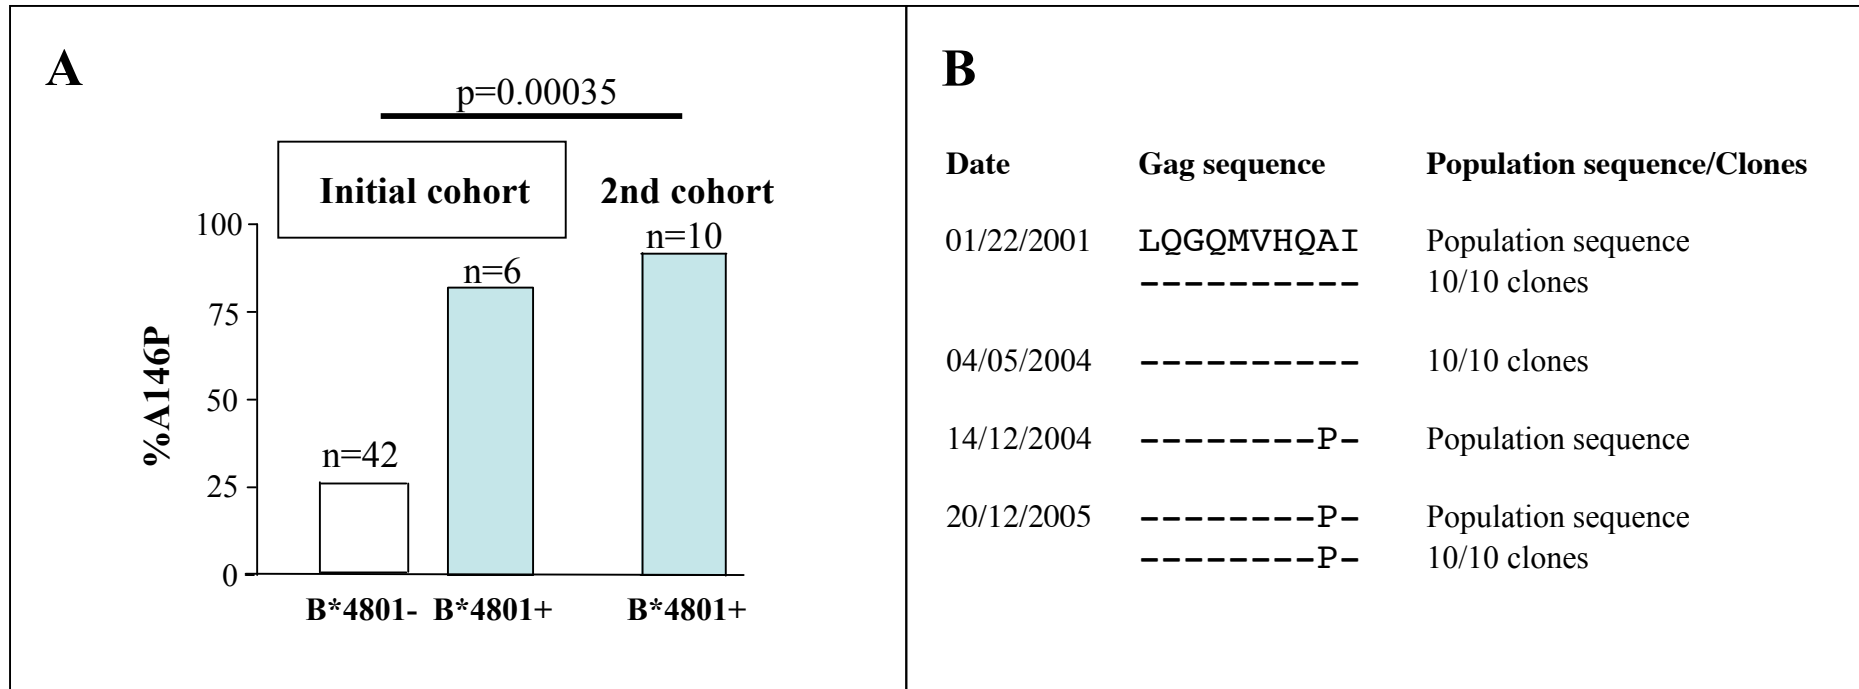

Suppl  
Fig 4

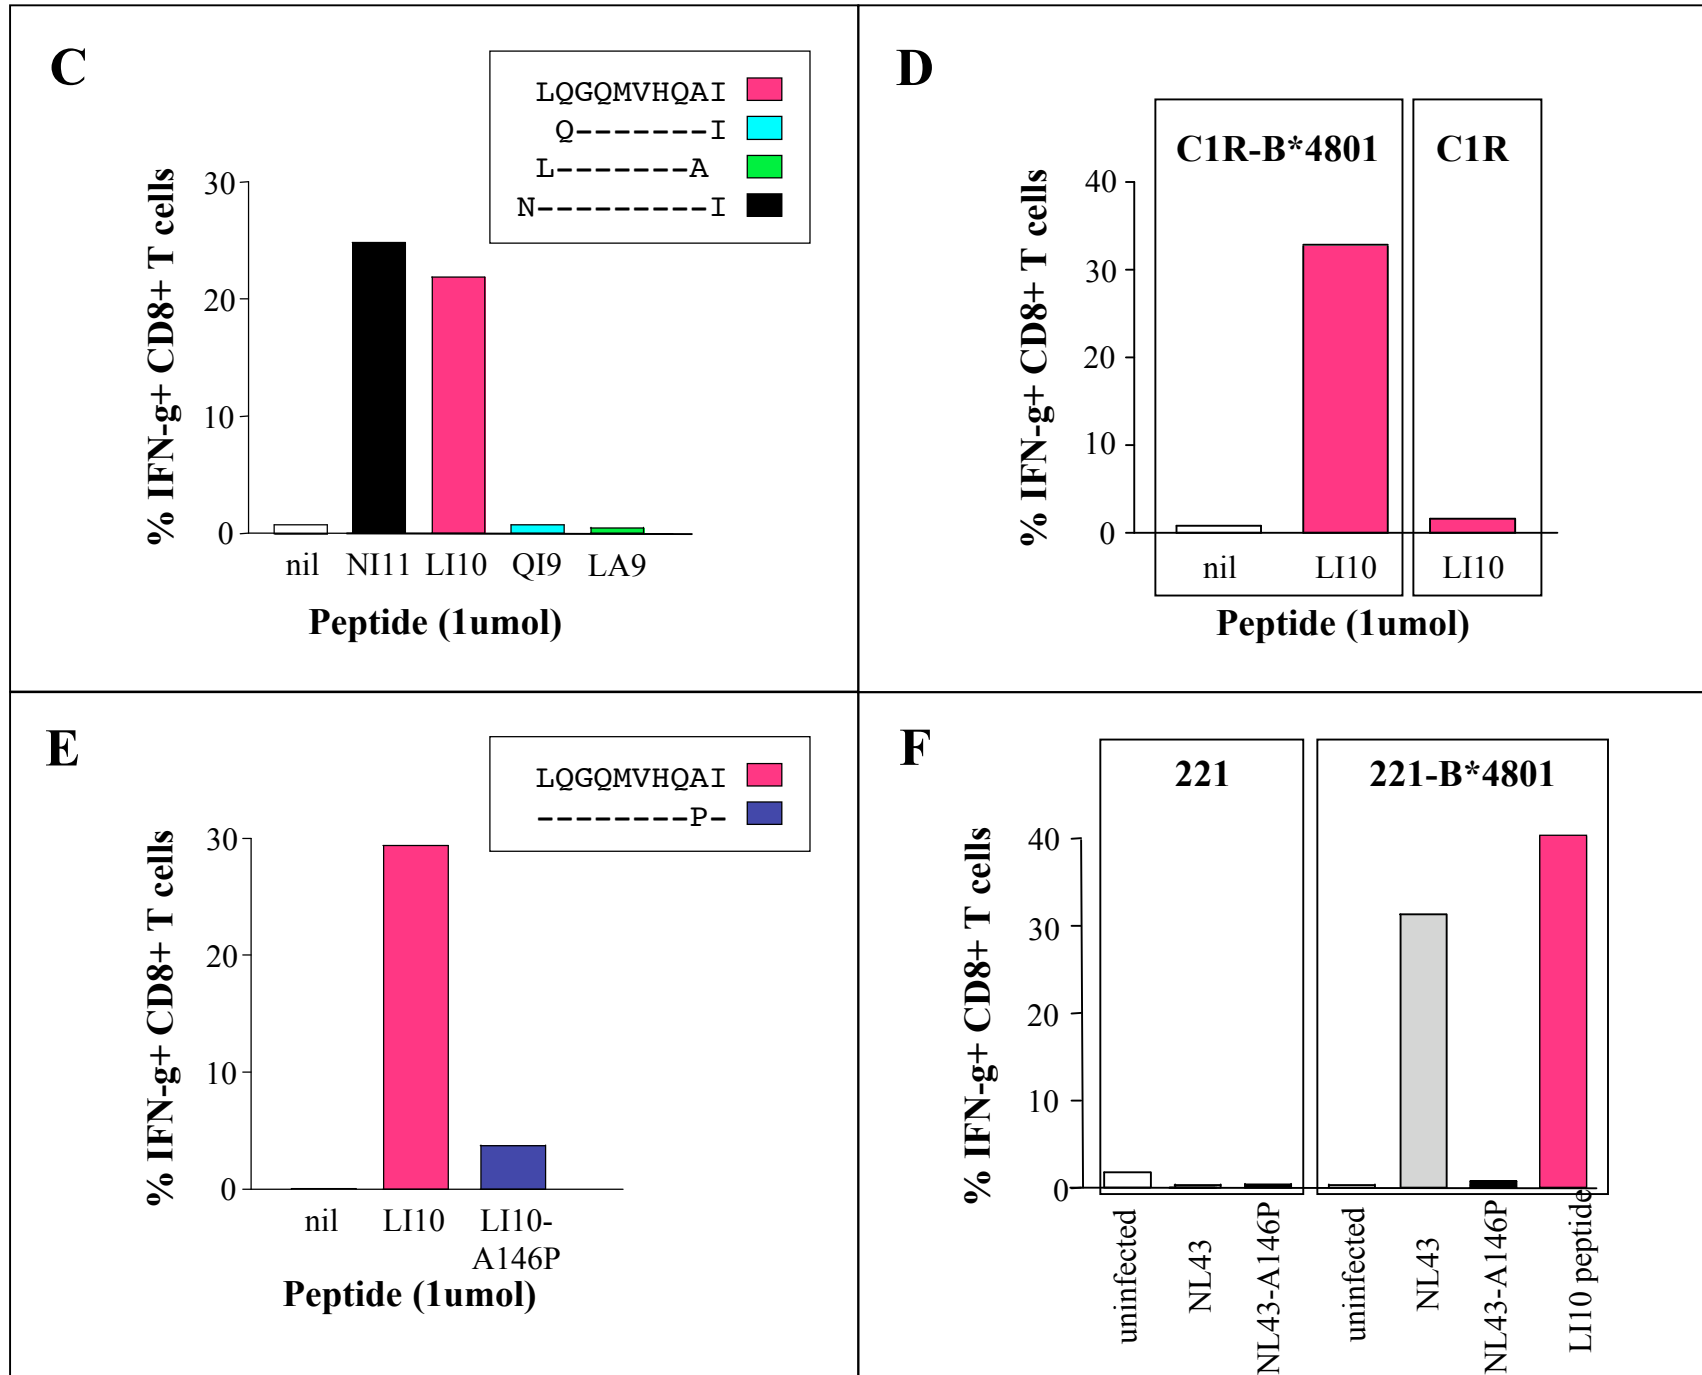

Suppl Fig 5

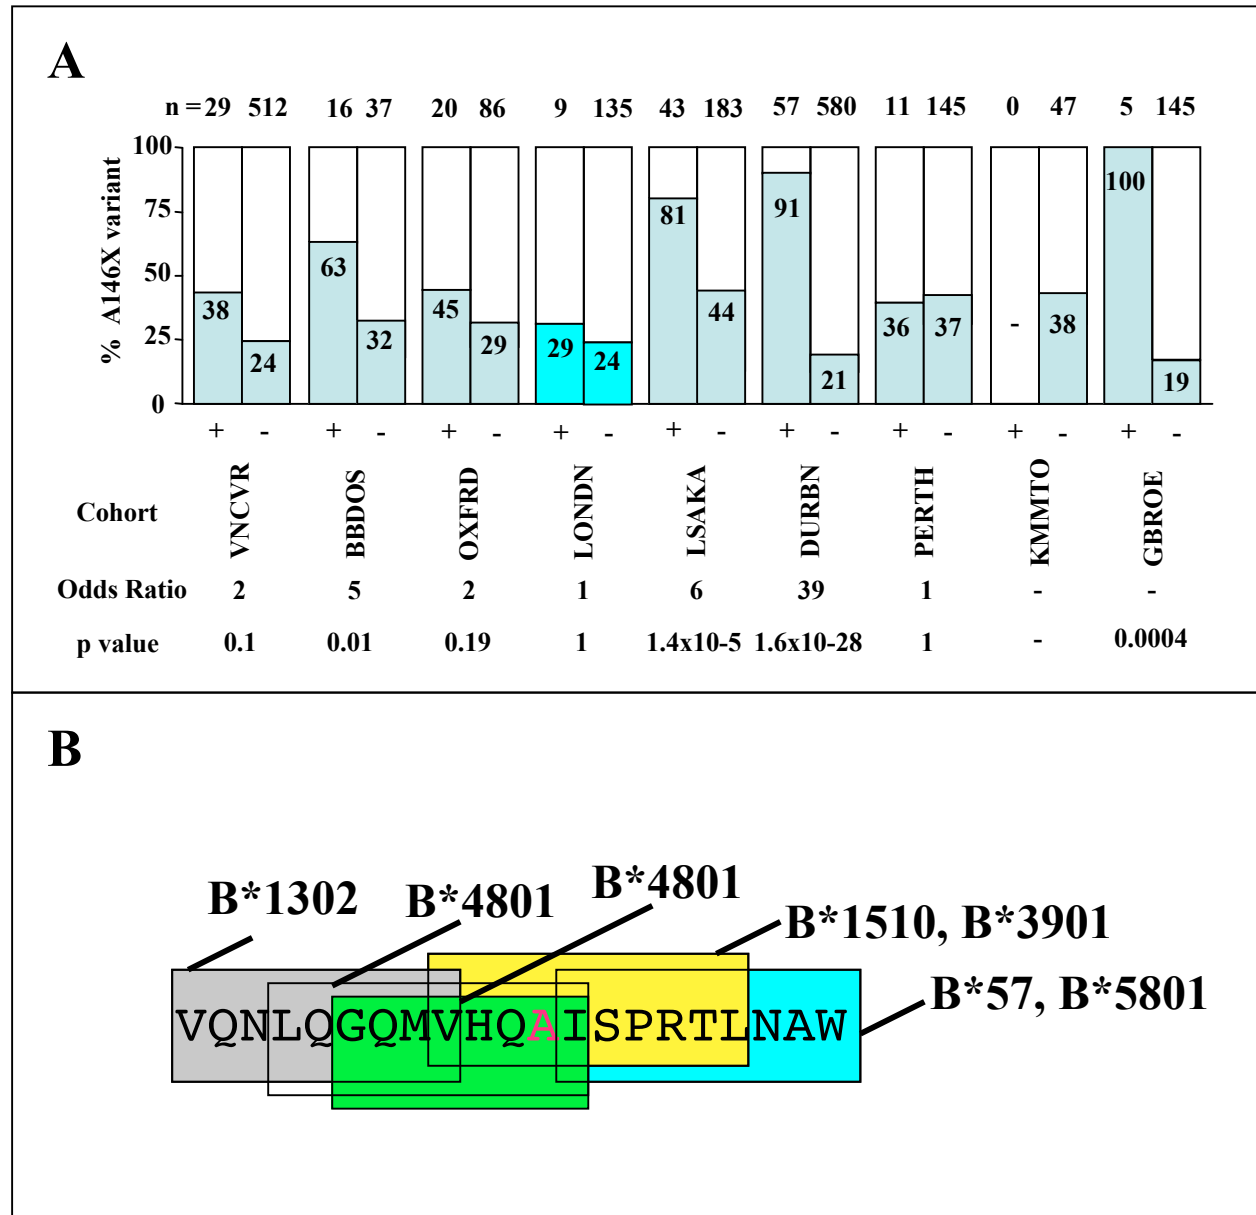

Suppl Fig 6

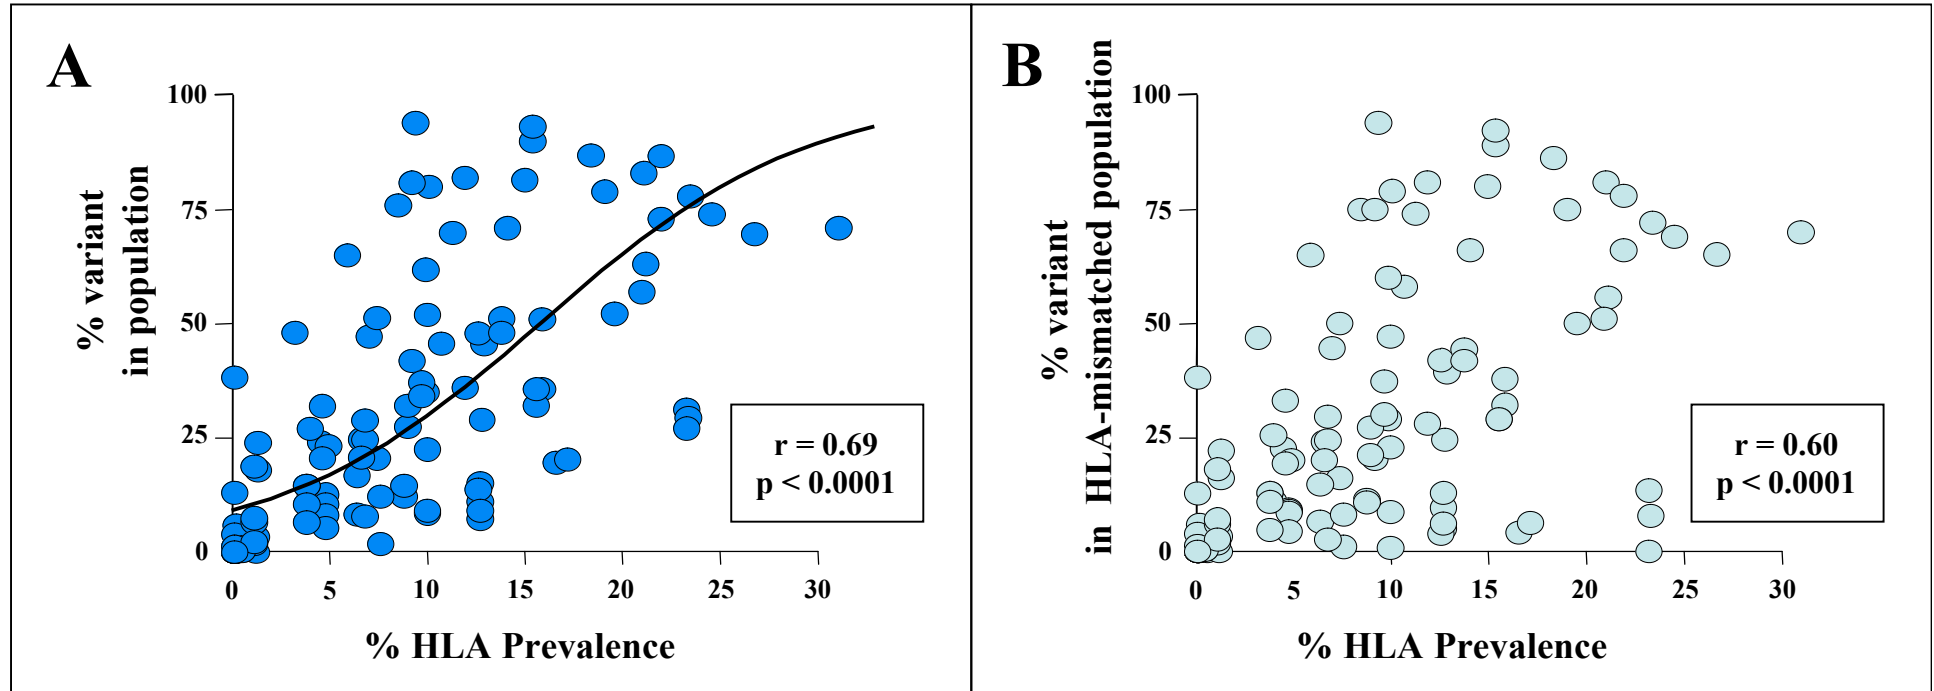

Suppl Fig 7

**A**

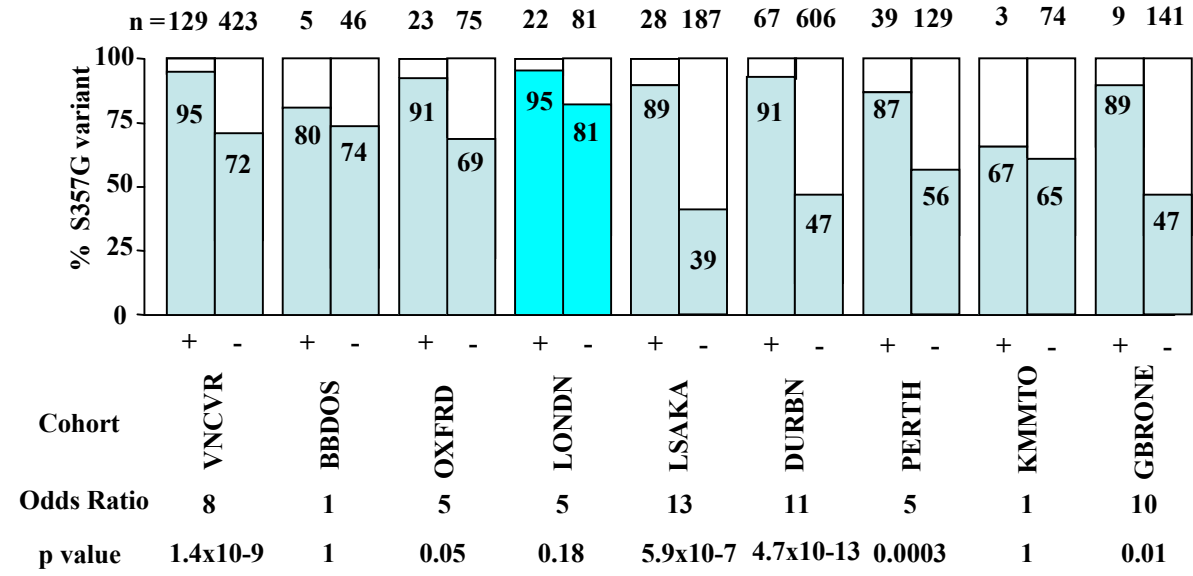

**B**

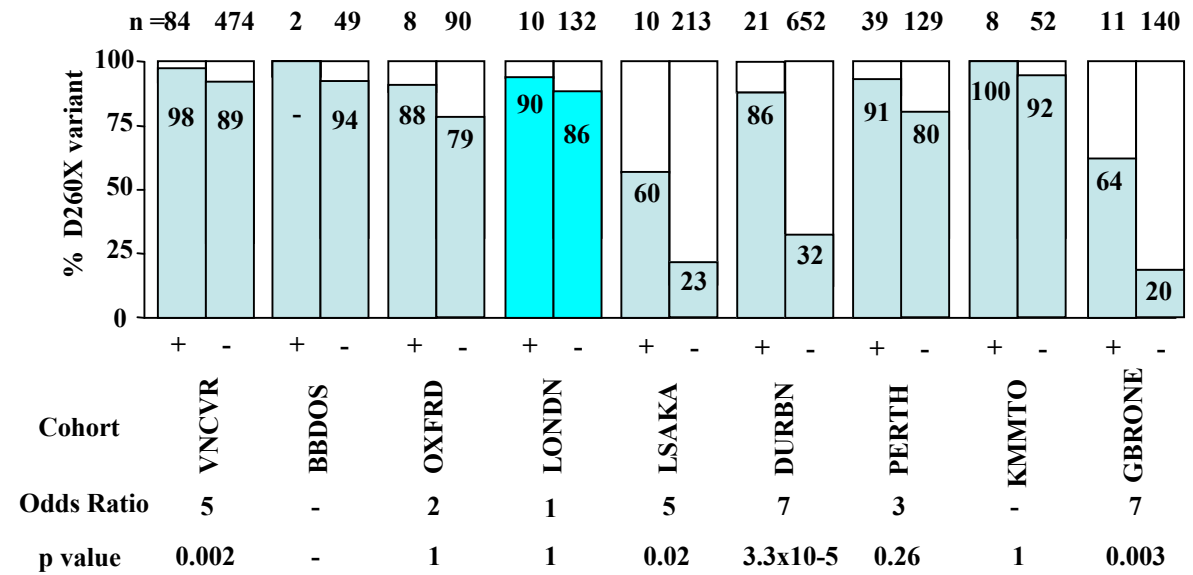



Suppl Fig 7

**C**

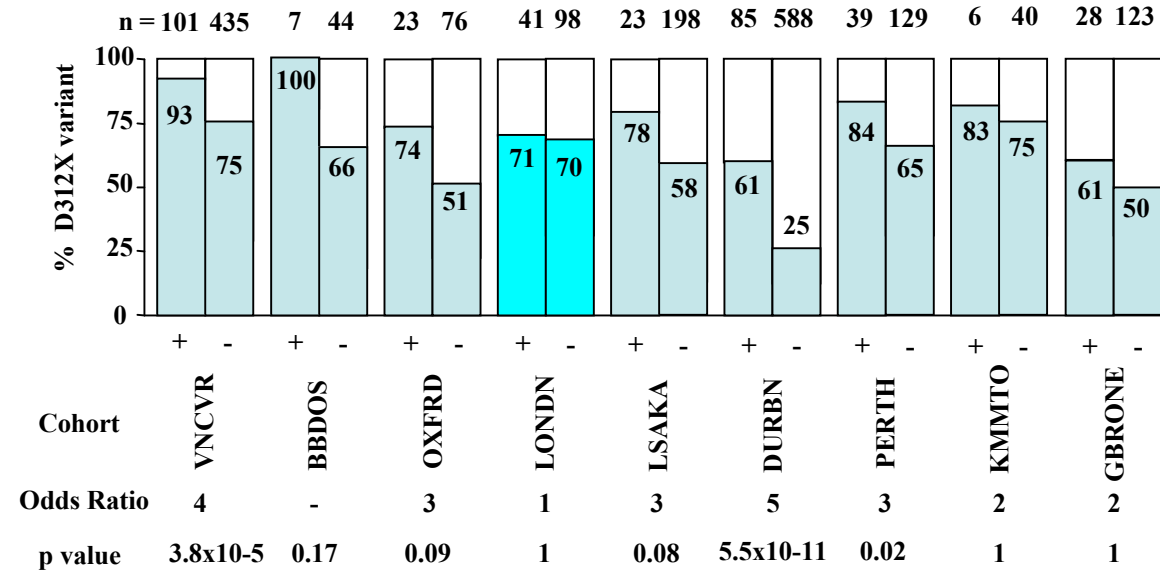

**D**

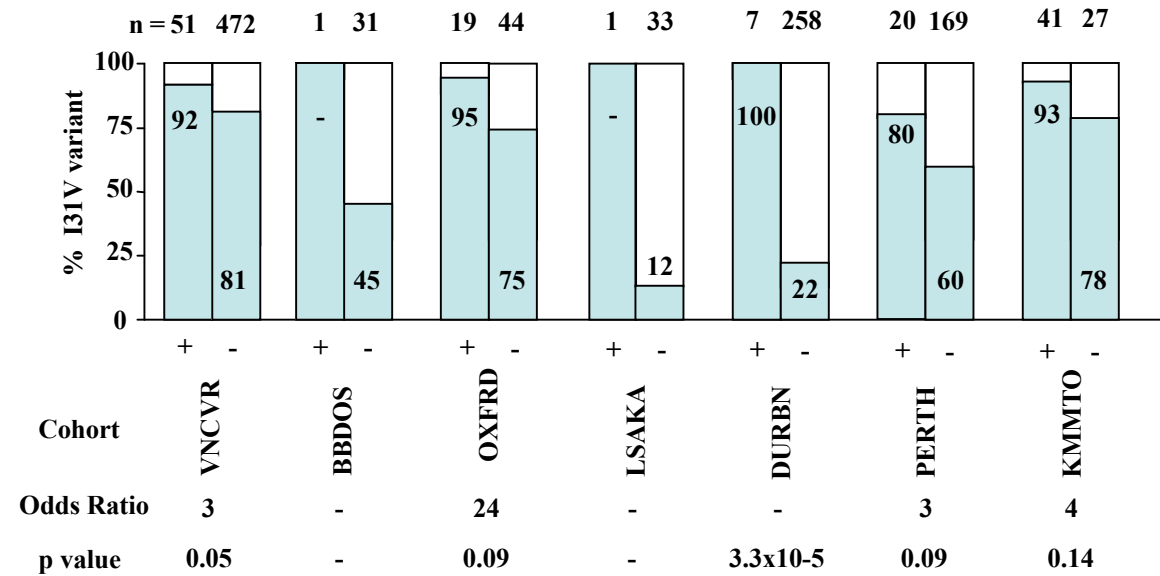

Suppl Fig 7

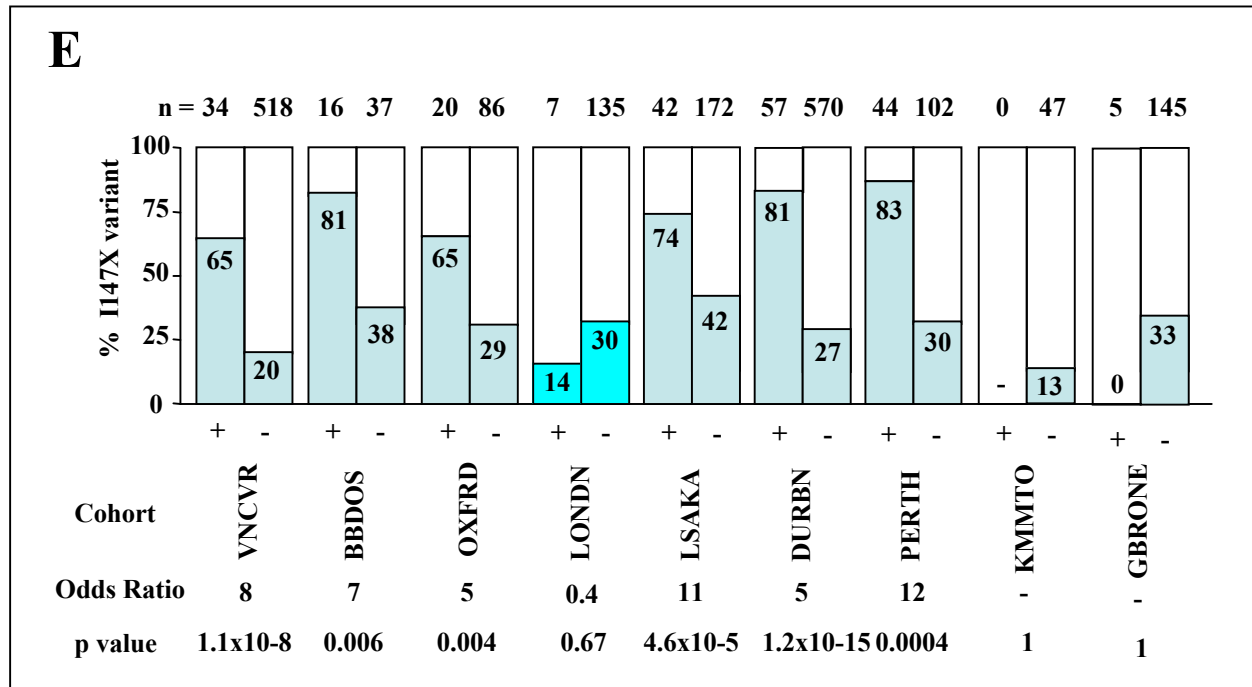

Suppl Table 1

**% Variant in Population versus Prevalence of HLA Allele in Population**

| Polymorphism      | Epitope                              | Linear Regression Model |         |                      | Logistic Regression Model |                |
|-------------------|--------------------------------------|-------------------------|---------|----------------------|---------------------------|----------------|
|                   |                                      | r                       | p       | (Pooled UK, r and p) | p                         | (Pooled UK, p) |
| I135X             | B*51-TAFTIP <u>S</u> I               | 0.94                    | 0.0002  | (0.95 and 0.0004)    | 0.0001                    | (<0.0001)      |
| S357X             | B*07-GP <u>S</u> HKARVL              | 0.67                    | 0.051   | (0.65 and 0.082)     | 0.004                     | (0.005)        |
| D260X             | B*35-PPIPVG <u>D</u> IY              | 0.81                    | 0.008   | (0.84 and 0.009)     | 0.016                     | (0.003)        |
| D312X             | B*44-AEQATQ <u>D</u> VKNW            | 0.30                    | 0.436   | (0.26 and 0.539)     | 0.080                     | (0.103)        |
| I31V              | B*51-LPPI <u>V</u> AKEI              | 0.84                    | 0.017   | (0.84 and 0.017)     | 0.001                     | (0.001)        |
| R264X             | B*27-KR <u>W</u> IILGLNK             | 0.85                    | 0.003   | (0.92 and 0.001)     | 0.003                     | (0.004)        |
| L268X             | B*27-KR <u>W</u> I <u>L</u> GLNK     | 0.93                    | 0.0002  | (0.94 and 0.0005)    | 0.001                     | (0.003)        |
| A146X             | B*57-A <u>I</u> SPRTLNAW             | 0.38                    | 0.317   | (0.36 and 0.378)     | 0.048                     | (0.068)        |
| I147X             | B*57-I <u>S</u> PRTLNAW              | 0.87                    | 0.002   | (0.91 and 0.002)     | 0.007                     | (0.007)        |
| A163X             | B*5703-K <u>A</u> FSPEVIPMF          | 0.80                    | 0.031   | (0.80 and 0.031)     | 0.110                     | (0.110)        |
| S165X             | B*5703-K <u>A</u> FSPEVIPMF          | 0.46                    | 0.303   | (0.46 and 0.303)     | 0.364                     | (0.364)        |
| I168V             | B*5703-K <u>A</u> FSPE <u>V</u> IPMF | 0.84                    | 0.019   | (0.84 and 0.019)     | 0.085                     | (0.085)        |
| T242X             | B*57/5801-TST <u>L</u> QEIQIAW       | 0.99                    | <0.0001 | (0.83 and 0.010)     | <0.0001                   | (0.0003)       |
| I247X             | B*5703-TST <u>L</u> QEIQIAW          | 0.91                    | 0.004   | (0.91 and 0.004)     | 0.041                     | (0.041)        |
| All polymorphisms |                                      | 0.69                    | <0.0001 | (0.69 and p<0.0001)  | <0.0001                   | (<0.0001)      |

Suppl Table 2

**% Variant in HLA-Mismatched Population versus Prevalence of HLA Allele in Population**

| Polymorphism      | Epitope                                | Linear Regression Model |         |                      |
|-------------------|----------------------------------------|-------------------------|---------|----------------------|
|                   |                                        | r                       | p       | (Pooled UK, r and p) |
| I135X             | B*51-TAFTIP <u>S</u> I                 | 0.91                    | 0.0006  | (0.93 and 0.001)     |
| S357X             | B*07-GP <u>S</u> HKARVL                | 0.49                    | 0.181   | (0.45 and 0.258)     |
| D260X             | B*35-PPIPVG <u>D</u> IY                | 0.81                    | 0.008   | (0.84 and 0.009)     |
| D312X             | B*44-AEQATQ <u>D</u> VKNW              | 0.19                    | 0.623   | (0.12 and 0.783)     |
| I31V              | B*51-LPP <u>I</u> VAKEI                | 0.81                    | 0.027   | (0.81 and 0.027)     |
| R264X             | B*27-K <u>R</u> WIILGLNK               | 0.85                    | 0.004   | (0.90 and 0.003)     |
| L268X             | B*27-K <u>R</u> WIILGLNK               | 0.87                    | 0.002   | (0.91 and 0.002)     |
| A146X             | B*57-A <u>I</u> SPRTLNAW               | 0.22                    | 0.562   | (0.21 and 0.616)     |
| I147X             | B*57-I <u>S</u> PRTLNAW                | 0.73                    | 0.025   | (0.82 and 0.012)     |
| A163X             | B*5703-K <u>A</u> FSPEVIPMF            | 0.66                    | 0.108   | (0.66 and 0.108)     |
| S165X             | B*5703-K <u>A</u> FSPEVIPMF            | 0.35                    | 0.439   | (0.35 and 0.439)     |
| I168V             | B*5703-K <u>A</u> FSPE <u>V</u> IPMF   | 0.87                    | 0.011   | (0.87 and 0.011)     |
| T242X             | B*57/5801-T <u>S</u> T <u>L</u> QEQIAW | 0.60                    | 0.090   | (0.54 and 0.164)     |
| I247X             | B*5703-T <u>S</u> T <u>L</u> QEQIAW    | 0.87                    | 0.012   | (0.87 and 0.012)     |
| All polymorphisms |                                        | 0.60                    | <0.0001 | (0.61 and p<0.0001)  |

Suppl Table 3

**Phylogenetically corrected and uncorrected HLA-HIV amino acid polymorphism associations  
(Vancouver, Perth, Kumamoto, Durban, Gaborone cohorts)**

| Polymorphism | Epitope                                | Uncorrected Fisher's  | Phylogenetically corrected |
|--------------|----------------------------------------|-----------------------|----------------------------|
|              |                                        | p                     | p                          |
| I135X        | B*51-TAFTIP <u>S</u> I                 | $1.5 \times 10^{-52}$ | $2.9 \times 10^{-45}$      |
| S357X        | B*07-GP <u>S</u> HKARVL                | $6.7 \times 10^{-24}$ | $8.7 \times 10^{-19}$      |
| D260X        | B*35-PPIPVGD <u>I</u> Y                | $3.8 \times 10^{-17}$ | $1.8 \times 10^{-9}$       |
| D312X        | B*44-AEQATQD <u>V</u> KNW              | $4.6 \times 10^{-16}$ | $3.1 \times 10^{-12}$      |
| I31V         | B*51-LPPI <u>V</u> AKEI                | $1.5 \times 10^{-7}$  | $9.2 \times 10^{-3}$       |
| R264X        | B*27-KR <u>W</u> IILGLNK               | $4.0 \times 10^{-10}$ | $2.8 \times 10^{-9}$       |
| L268X        | B*27-KR <u>W</u> I <u>L</u> GLNK       | $7.1 \times 10^{-10}$ | $3.4 \times 10^{-10}$      |
| A146X        | B*57-A <u>I</u> SPRTLNAW               | $8.2 \times 10^{-20}$ | $1.7 \times 10^{-9}$       |
| I147X        | B*57-I <u>S</u> PRTLNAW                | $3.6 \times 10^{-23}$ | $7.5 \times 10^{-6}$       |
| A163X        | B*5703-K <u>A</u> FSPEVIPMF            | $1.3 \times 10^{-21}$ | $1.8 \times 10^{-18}$      |
| S165X        | B*5703-K <u>A</u> FSPEVIPMF            | $3.7 \times 10^{-12}$ | $5.7 \times 10^{-6}$       |
| I168V        | B*5703-K <u>A</u> FSPE <u>V</u> IPMF   | ns                    | ns                         |
| T242X        | B*57/5801-T <u>S</u> TLQE <u>Q</u> IAW | $3.9 \times 10^{-64}$ | $2.1 \times 10^{-45}$      |
| I247X        | B*5703-T <u>S</u> TLQE <u>Q</u> IAW    | $5.7 \times 10^{-7}$  | $4.9 \times 10^{-6}$       |

## **SUPPLEMENTARY INFORMATION**

### **Genbank numbers:**

#### **Durban sequences:**

Gag: FJ198407-FJ199088

Pol: FJ199532-FJ199992

#### **Gaborone Sequences:**

Gag p17+p24: FJ497801-FJ497950

Gag p15: FJ497951-FJ498243

Pol: FJ498244-FJ498543

Nef: FJ498544-FJ498779

#### **London Sequences:**

Gag: FJ473452-FJ474070
